# Supplementary material for: Combined Effects of Polystyrene Nanoplastics and Enrofloxacin on the Life Histories and Gut Microbiota of Daphnia magna
Source: MDPI journal article supplement (doi:10.3390/w14213403), 2022-10-27
Supplement: s1 [file s1]

**Table S1.** The results of the analysis of ART two-way ANOVA for both stressors PS-NPs, enrofloxacin and their interaction on the life history parameters and on the respiration rate of gut microbiota of *Daphnia*. Statistically significant differences effect are marked with bold (df – degree of freedom, *F* – F-ratio, *P* – *p*-value corrected).

| Parameters              | Factor; Interaction | df | <i>F</i>      | <i>P</i>          |
|-------------------------|---------------------|----|---------------|-------------------|
| Life history parameters | NPs                 | 3  | 2.008         | 0.111             |
|                         | Body length         | 2  | 2.582         | 0.076             |
|                         | NPs × ENR           | 6  | 3.474         | 0.071             |
|                         | NPs                 | 3  | <b>5.252</b>  | <b>0.001</b>      |
|                         | Body volume         | 2  | <b>11.223</b> | <b>&lt; 0.001</b> |
|                         | NPs × ENR           | 6  | <b>2.914</b>  | <b>0.008</b>      |
|                         | NPs                 | 3  | <b>17.129</b> | <b>&lt; 0.001</b> |
|                         | Cluth size          | 2  | <b>20.299</b> | <b>&lt; 0.001</b> |
|                         | NPs × ENR           | 6  | <b>5.061</b>  | <b>&lt; 0.001</b> |
|                         | NPs                 | 3  | <b>14.358</b> | <b>&lt; 0.001</b> |
|                         | Egg volume          | 2  | <b>25.442</b> | <b>&lt; 0.001</b> |
|                         | NPs × ENR           | 6  | <b>8.055</b>  | <b>&lt; 0.001</b> |
|                         | NPs                 | 3  | <b>31.188</b> | <b>&lt; 0.001</b> |
|                         | Cluth volume        | 2  | <b>60.368</b> | <b>&lt; 0.001</b> |
|                         | NPs × ENR           | 6  | <b>6.664</b>  | <b>&lt; 0.001</b> |
| Metabolic rate          | NPs                 | 3  | <b>16.062</b> | <b>&lt; 0.001</b> |
|                         | ENR                 | 2  | <b>81.844</b> | <b>&lt; 0.001</b> |
|                         | NPs × ENR           | 6  | <b>13.375</b> | <b>&lt; 0.001</b> |

**Table S2.** The results of planned contrasts of estimated marginal means based on two-way ART ANOVA for the effect of single and combined stressors on the life history parameters and on the respiration rate of gut microbiota of *Daphnia* for the combined data from all levels of NPs density ( $N_l = 10^3$ ,  $N_m = 10^6$ , and  $N_h = 10^9$  particles  $L^{-1}$ ) and from all levels of enrofloxacin concentration ( $E_l = 10$  and  $E_h = 100$  ng  $L^{-1}$ ). Statistically significant differences effect are marked with bold (E – estimate, T – T-ratio, P corr. –  $p$ -value corrected).

| Parameters              |              | Contrast                             | E           | T              | $P_{\text{corr.}}$ |
|-------------------------|--------------|--------------------------------------|-------------|----------------|--------------------|
| Life history parameters | Body length  | $N_{\text{mean}} - \text{Control}$   | -109        | -1.987         | 0.188              |
|                         |              | $E_{\text{mean}} - \text{Control}$   | -93         | -1.621         | 0.315              |
|                         |              | $NE_{\text{mean}} - N_{\text{mean}}$ | -28         | -0.832         | 0.498              |
|                         |              | $NE_{\text{mean}} - E_{\text{mean}}$ | -43         | -1.153         | 0.498              |
|                         | Body volume  | $N_{\text{mean}} - \text{Control}$   | -94         | -1.736         | 0.083              |
|                         |              | $E_{\text{mean}} - \text{Control}$   | -127        | -2.224         | 0.071              |
|                         |              | $NE_{\text{mean}} - N_{\text{mean}}$ | <b>-138</b> | <b>-3.577</b>  | <b>0.001</b>       |
|                         |              | $NE_{\text{mean}} - E_{\text{mean}}$ | <b>-105</b> | <b>-2.263</b>  | <b>0.031</b>       |
|                         | Cluth size   | $N_{\text{mean}} - \text{Control}$   | <b>-98</b>  | <b>-5.127</b>  | <b>&lt; 0.001</b>  |
|                         |              | $E_{\text{mean}} - \text{Control}$   | <b>-82</b>  | <b>-4.280</b>  | <b>&lt; 0.001</b>  |
|                         |              | $NE_{\text{mean}} - N_{\text{mean}}$ | -22         | -1.127         | 0.260              |
|                         |              | $NE_{\text{mean}} - E_{\text{mean}}$ | -37         | -1.913         | 0.112              |
|                         | Egg volume   | $N_{\text{mean}} - \text{Control}$   | <b>-108</b> | <b>-4.614</b>  | <b>&lt; 0.001</b>  |
|                         |              | $E_{\text{mean}} - \text{Control}$   | <b>-115</b> | <b>-5.026</b>  | <b>&lt; 0.001</b>  |
|                         |              | $NE_{\text{mean}} - N_{\text{mean}}$ | -49         | -2.077         | 0.076              |
|                         |              | $NE_{\text{mean}} - E_{\text{mean}}$ | -42         | -1.809         | 0.076              |
|                         | Cluth volume | $N_{\text{mean}} - \text{Control}$   | <b>-115</b> | <b>-7.111</b>  | <b>&lt; 0.001</b>  |
|                         |              | $E_{\text{mean}} - \text{Control}$   | <b>-117</b> | <b>-7.338</b>  | <b>&lt; 0.001</b>  |
|                         |              | $NE_{\text{mean}} - N_{\text{mean}}$ | -40         | -2.495         | 0.056              |
|                         |              | $NE_{\text{mean}} - E_{\text{mean}}$ | -39         | -2.433         | 0.056              |
| Metabolic rate          |              | $N_{\text{mean}} - \text{Control}$   | <b>104</b>  | <b>5.801</b>   | <b>&lt; 0.001</b>  |
|                         |              | $E_{\text{mean}} - \text{Control}$   | -43         | -2.242         | 0.051              |
|                         |              | $NE_{\text{mean}} - N_{\text{mean}}$ | <b>-125</b> | <b>-11.395</b> | <b>&lt; 0.001</b>  |
|                         |              | $NE_{\text{mean}} - E_{\text{mean}}$ | 22          | 1.699          | 0.090              |

**Table S3.** The results of planned contrasts of estimated marginal means based on two-way ART ANOVA for all relevant comparisons between nanoplastic and enrofloxacin treatments on the body length of *Daphnia*. Statistically significant differences effect are marked with bold (E – estimate, SE – standard error,  $T$  – T-ratio,  $P_{\text{corr.}}$  –  $p$ -value corrected).

| Contrast                                                      | E    | SE | $T$    | $P_{\text{corr.}}$ |
|---------------------------------------------------------------|------|----|--------|--------------------|
| N <sub>l</sub> – Control                                      | -67  | 67 | -0.994 | 1.000              |
| N <sub>m</sub> – Control                                      | -206 | 68 | -3.036 | 0.146              |
| N <sub>h</sub> – Control                                      | -53  | 65 | -0.813 | 1.000              |
| E <sub>l</sub> – Control                                      | -19  | 66 | -0.293 | 1.000              |
| E <sub>h</sub> – Control                                      | -167 | 66 | -2.544 | 0.551              |
| N <sub>m</sub> – N <sub>l</sub>                               | -140 | 68 | -2.062 | 1.000              |
| N <sub>h</sub> – N <sub>l</sub>                               | 13   | 65 | 0.207  | 1.000              |
| N <sub>l</sub> E <sub>l</sub> – N <sub>l</sub>                | -161 | 66 | -2.457 | 0.649              |
| N <sub>l</sub> E <sub>h</sub> – N <sub>l</sub>                | 55   | 70 | 0.788  | 1.000              |
| N <sub>h</sub> – N <sub>m</sub>                               | 153  | 66 | 2.318  | 0.924              |
| N <sub>m</sub> E <sub>l</sub> – N <sub>m</sub>                | -29  | 68 | -0.432 | 1.000              |
| N <sub>m</sub> E <sub>h</sub> – N <sub>m</sub>                | 165  | 65 | 2.53   | 0.561              |
| N <sub>h</sub> E <sub>l</sub> – N <sub>h</sub>                | -44  | 65 | -0.687 | 1.000              |
| N <sub>h</sub> E <sub>h</sub> – N <sub>h</sub>                | -151 | 65 | -2.303 | 0.942              |
| N <sub>l</sub> E <sub>l</sub> – E <sub>l</sub>                | -209 | 65 | -3.22  | 0.082              |
| N <sub>m</sub> E <sub>l</sub> – E <sub>l</sub>                | -216 | 66 | -3.281 | 0.067              |
| N <sub>h</sub> E <sub>l</sub> – E <sub>l</sub>                | -78  | 65 | -1.193 | 1.000              |
| E <sub>h</sub> – E <sub>l</sub>                               | -147 | 64 | -2.287 | 0.959              |
| N <sub>m</sub> E <sub>l</sub> – N <sub>l</sub> E <sub>l</sub> | -8   | 66 | -0.118 | 1.000              |
| N <sub>h</sub> E <sub>l</sub> – N <sub>l</sub> E <sub>l</sub> | 130  | 65 | 2.004  | 1.000              |
| N <sub>l</sub> E <sub>h</sub> – N <sub>l</sub> E <sub>l</sub> | 216  | 69 | 3.152  | 0.100              |
| N <sub>h</sub> E <sub>l</sub> – N <sub>m</sub> E <sub>l</sub> | 138  | 66 | 2.082  | 1.000              |
| N <sub>m</sub> E <sub>h</sub> – N <sub>m</sub> E <sub>l</sub> | 194  | 64 | 3.027  | 0.147              |
| N <sub>h</sub> E <sub>h</sub> – N <sub>h</sub> E <sub>l</sub> | -106 | 67 | -1.593 | 1.000              |
| N <sub>l</sub> E <sub>h</sub> – E <sub>h</sub>                | 155  | 68 | 2.271  | 0.976              |
| N <sub>m</sub> E <sub>h</sub> – E <sub>h</sub>                | 125  | 63 | 2.012  | 1.000              |
| N <sub>h</sub> E <sub>h</sub> – E <sub>h</sub>                | -37  | 66 | -0.563 | 1.000              |
| N <sub>m</sub> E <sub>h</sub> – N <sub>l</sub> E <sub>h</sub> | -30  | 67 | -0.444 | 1.000              |
| N <sub>h</sub> E <sub>h</sub> – N <sub>l</sub> E <sub>h</sub> | -192 | 70 | -2.744 | 0.318              |
| N <sub>h</sub> E <sub>h</sub> – N <sub>m</sub> E <sub>h</sub> | -162 | 64 | -2.517 | 0.561              |

**Table S4.** The results of planned contrasts of estimated marginal means based on two-way ART ANOVA for all relevant comparisons between nanoplastic and enrofloxacin treatments on the body volume of *Daphnia*. Statistically significant differences effect are marked with bold (E – estimate, SE – standard error,  $T$  – T-ratio,  $P_{\text{corr.}}$  –  $p$ -value corrected).

| Contrast               | E           | SE        | $T$           | $P_{\text{corr.}}$ |
|------------------------|-------------|-----------|---------------|--------------------|
| $N_l - \text{Control}$ | -36         | 67        | -0.533        | 1.000              |
| $N_m - \text{Control}$ | -201        | 67        | -2.984        | 0.161              |
| $N_h - \text{Control}$ | -46         | 65        | -0.712        | 1.000              |
| $E_l - \text{Control}$ | -74         | 66        | -1.134        | 1.000              |
| $E_h - \text{Control}$ | -180        | 66        | -2.737        | 0.331              |
| $N_m - N_l$            | -166        | 67        | -2.464        | 0.662              |
| $N_h - N_l$            | -11         | 65        | -0.165        | 1.000              |
| $N_l E_l - N_l$        | -204        | 65        | -3.125        | 0.106              |
| $N_l E_h - N_l$        | -106        | 69        | -1.533        | 1.000              |
| $N_h - N_m$            | 155         | 66        | 2.364         | 0.835              |
| $N_m E_l - N_m$        | -159        | 67        | -2.377        | 0.825              |
| $N_m E_h - N_m$        | 60          | 65        | 0.924         | 1.000              |
| $N_h E_l - N_h$        | -138        | 64        | -2.153        | 1.000              |
| $N_h E_h - N_h$        | -161        | 65        | -2.475        | 0.656              |
| $N_l E_l - E_l$        | -165        | 64        | -2.563        | 0.522              |
| $N_m E_l - E_l$        | <b>-286</b> | <b>65</b> | <b>-4.391</b> | <b>0.001</b>       |
| $N_h E_l - E_l$        | -110        | 65        | -1.69         | 1.000              |
| $E_h - E_l$            | -106        | 65        | -1.631        | 1.000              |
| $N_m E_l - N_l E_l$    | -121        | 65        | -1.862        | 1.000              |
| $N_h E_l - N_l E_l$    | 55          | 65        | 0.849         | 1.000              |
| $N_l E_h - N_l E_l$    | 98          | 68        | 1.433         | 1.000              |
| $N_h E_l - N_m E_l$    | 176         | 65        | 2.682         | 0.383              |
| $N_m E_h - N_m E_l$    | 209         | 64        | 3.231         | 0.057              |
| $N_h E_h - N_h E_l$    | -22         | 66        | -0.338        | 1.000              |
| $N_l E_h - E_h$        | 38          | 68        | 0.559         | 1.000              |
| $N_m E_h - E_h$        | 39          | 63        | 0.615         | 1.000              |
| $N_h E_h - E_h$        | -27         | 66        | -0.407        | 1.000              |
| $N_m E_h - N_l E_h$    | 1           | 67        | 0.011         | 1.000              |
| $N_h E_h - N_l E_h$    | -65         | 69        | -0.937        | 1.000              |
| $N_h E_h - N_m E_h$    | -66         | 64        | -1.020        | 1.000              |

**Table S5.** The results of planned contrasts of estimated marginal means based on two-way ART ANOVA for all relevant comparisons between nanoplastic and enrofloxacin treatments on the clutch size of *Daphnia*. Statistically significant differences effect are marked with bold (E – estimate, SE – standard error,  $T$  – T-ratio,  $P_{\text{corr.}}$  –  $p$ -value corrected).

| Contrast               | E           | SE        | $T$           | $P_{\text{corr.}}$ |
|------------------------|-------------|-----------|---------------|--------------------|
| $N_l - \text{Control}$ | <b>-214</b> | <b>55</b> | <b>-3.89</b>  | <b>0.005</b>       |
| $N_m - \text{Control}$ | <b>-304</b> | <b>57</b> | <b>-5.355</b> | <b>&lt; 0.001</b>  |
| $N_h - \text{Control}$ | <b>-283</b> | <b>54</b> | <b>-5.227</b> | <b>&lt; 0.001</b>  |
| $E_l - \text{Control}$ | <b>-216</b> | <b>55</b> | <b>-3.92</b>  | <b>0.005</b>       |
| $E_h - \text{Control}$ | <b>-262</b> | <b>54</b> | <b>-4.822</b> | <b>&lt; 0.001</b>  |
| $N_m - N_l$            | -89         | 58        | -1.549        | 1.000              |
| $N_h - N_l$            | -68         | 55        | -1.238        | 1.000              |
| $N_l E_l - N_l$        | 32          | 58        | 0.548         | 1.000              |
| $N_l E_h - N_l$        | -146        | 59        | -2.498        | 0.542              |
| $N_h - N_m$            | 21          | 57        | 0.374         | 1.000              |
| $N_m E_l - N_m$        | -153        | 60        | -2.547        | 0.482              |
| $N_m E_h - N_m$        | -13         | 57        | -0.229        | 1.000              |
| $N_h E_l - N_h$        | -41         | 56        | -0.738        | 1.000              |
| $N_h E_h - N_h$        | -170        | 58        | -2.947        | 0.146              |
| $N_l E_l - E_l$        | 33          | 58        | 0.571         | 1.000              |
| $N_m E_l - E_l$        | <b>-241</b> | <b>58</b> | <b>-4.129</b> | <b>0.002</b>       |
| $N_h E_l - E_l$        | -108        | 57        | -1.907        | 1.000              |
| $E_h - E_l$            | -47         | 55        | -0.843        | 1.000              |
| $N_m E_l - N_l E_l$    | <b>-274</b> | <b>60</b> | <b>-4.559</b> | <b>&lt; 0.001</b>  |
| $N_h E_l - N_l E_l$    | -141        | 59        | -2.412        | 0.638              |
| $N_l E_h - N_l E_l$    | -178        | 60        | -2.956        | 0.145              |
| $N_h E_l - N_m E_l$    | 133         | 59        | 2.248         | 0.889              |
| $N_m E_h - N_m E_l$    | 140         | 58        | 2.407         | 0.638              |
| $N_h E_h - N_h E_l$    | -129        | 59        | -2.173        | 1.000              |
| $N_l E_h - E_h$        | -98         | 58        | -1.699        | 1.000              |
| $N_m E_h - E_h$        | -55         | 55        | -0.994        | 1.000              |
| $N_h E_h - E_h$        | -190        | 58        | -3.282        | 0.052              |
| $N_m E_h - N_l E_h$    | 44          | 58        | 0.751         | 1.000              |
| $N_h E_h - N_l E_h$    | -92         | 61        | -1.509        | 1.000              |
| $N_h E_h - N_m E_h$    | -136        | 58        | -2.33         | 0.740              |

**Table S6.** The results of planned contrasts of estimated marginal means based on two-way ART ANOVA for all relevant comparisons between nanoplastic and enrofloxacin treatments on the egg volume of *Daphnia*. Statistically significant differences effect are marked with bold (E – estimate, SE – standard error,  $T$  – T-ratio,  $P_{\text{corr.}}$  –  $p$ -value corrected).

| Contrast               | E           | SE        | $T$           | $P_{\text{corr.}}$ |
|------------------------|-------------|-----------|---------------|--------------------|
| $N_l - \text{Control}$ | <b>-302</b> | <b>70</b> | <b>-4.318</b> | <b>0.001</b>       |
| $N_m - \text{Control}$ | <b>-302</b> | <b>71</b> | <b>-4.238</b> | <b>0.001</b>       |
| $N_h - \text{Control}$ | <b>-330</b> | <b>66</b> | <b>-4.967</b> | <b>&lt; 0.001</b>  |
| $E_l - \text{Control}$ | -202        | 68        | -2.979        | 0.137              |
| $E_h - \text{Control}$ | <b>-445</b> | <b>66</b> | <b>-6.716</b> | <b>&lt; 0.001</b>  |
| $N_m - N_l$            | 0           | 75        | -0.005        | 1.000              |
| $N_h - N_l$            | -29         | 71        | -0.405        | 1.000              |
| $N_l E_l - N_l$        | -114        | 72        | -1.585        | 1.000              |
| $N_l E_h - N_l$        | -76         | 74        | -1.023        | 1.000              |
| $N_h - N_m$            | -28         | 72        | -0.392        | 1.000              |
| $N_m E_l - N_m$        | -30         | 75        | -0.396        | 1.000              |
| $N_m E_h - N_m$        | <b>-270</b> | <b>70</b> | <b>-3.882</b> | <b>0.006</b>       |
| $N_h E_l - N_h$        | 16          | 70        | 0.234         | 1.000              |
| $N_h E_h - N_h$        | -171        | 70        | -2.444        | 0.613              |
| $N_l E_l - E_l$        | -214        | 70        | -3.071        | 0.104              |
| $N_m E_l - E_l$        | -130        | 71        | -1.828        | 1.000              |
| $N_h E_l - E_l$        | -112        | 71        | -1.576        | 1.000              |
| $E_h - E_l$            | <b>-243</b> | <b>68</b> | <b>-3.57</b>  | <b>0.018</b>       |
| $N_m E_l - N_l E_l$    | 84          | 71        | 1.176         | 1.000              |
| $N_h E_l - N_l E_l$    | 102         | 71        | 1.423         | 1.000              |
| $N_l E_h - N_l E_l$    | 38          | 72        | 0.521         | 1.000              |
| $N_h E_l - N_m E_l$    | 18          | 73        | 0.244         | 1.000              |
| $N_m E_h - N_m E_l$    | <b>-241</b> | <b>68</b> | <b>-3.557</b> | <b>0.019</b>       |
| $N_h E_h - N_h E_l$    | -187        | 73        | -2.574        | 0.435              |
| $N_l E_h - E_h$        | 67          | 71        | 0.943         | 1.000              |
| $N_m E_h - E_h$        | -128        | 64        | -1.985        | 1.000              |
| $N_h E_h - E_h$        | -56         | 70        | -0.811        | 1.000              |
| $N_m E_h - N_l E_h$    | -195        | 69        | -2.829        | 0.217              |
| $N_h E_h - N_l E_h$    | -123        | 74        | -1.673        | 1.000              |
| $N_h E_h - N_m E_h$    | 72          | 68        | 1.060         | 1.000              |

**Table S7.** The results of planned contrasts of estimated marginal means based on two-way ART ANOVA for all relevant comparisons between nanoplastic and enrofloxacin treatments on the clutch volume of *Daphnia*. Statistically significant differences effect are marked with bold (E – estimate, SE – standard error,  $T$  – T-ratio,  $P_{\text{corr.}}$  –  $p$ -value corrected).

| Contrast               | E           | SE        | $T$           | $P_{\text{corr.}}$ |
|------------------------|-------------|-----------|---------------|--------------------|
| $N_l - \text{Control}$ | <b>-305</b> | <b>49</b> | <b>-6.233</b> | <b>&lt; 0.001</b>  |
| $N_m - \text{Control}$ | <b>-349</b> | <b>50</b> | <b>-6.968</b> | <b>&lt; 0.001</b>  |
| $N_h - \text{Control}$ | <b>-302</b> | <b>48</b> | <b>-6.343</b> | <b>&lt; 0.001</b>  |
| $E_l - \text{Control}$ | <b>-265</b> | <b>48</b> | <b>-5.525</b> | <b>&lt; 0.001</b>  |
| $E_h - \text{Control}$ | <b>-405</b> | <b>47</b> | <b>-8.535</b> | <b>&lt; 0.001</b>  |
| $N_m - N_l$            | -44         | 51        | -0.877        | 1.000              |
| $N_h - N_l$            | 2           | 48        | 0.049         | 1.000              |
| $N_l E_l - N_l$        | -41         | 49        | -0.830        | 1.000              |
| $N_l E_h - N_l$        | <b>-171</b> | <b>50</b> | <b>-3.381</b> | <b>0.031</b>       |
| $N_h - N_m$            | 47          | 49        | 0.946         | 1.000              |
| $N_m E_l - N_m$        | -119        | 52        | -2.275        | 0.645              |
| $N_m E_h - N_m$        | <b>-206</b> | <b>48</b> | <b>-4.268</b> | <b>0.001</b>       |
| $N_h E_l - N_h$        | -126        | 49        | -2.580        | 0.339              |
| $N_h E_h - N_h$        | -241        | 49        | -4.958        | <b>&lt; 0.001</b>  |
| $N_l E_l - E_l$        | -80         | 48        | -1.654        | 1.000              |
| $N_m E_l - E_l$        | <b>-202</b> | <b>50</b> | <b>-4.030</b> | <b>0.003</b>       |
| $N_h E_l - E_l$        | <b>-162</b> | <b>49</b> | <b>-3.312</b> | <b>0.038</b>       |
| $E_h - E_l$            | -140        | 47        | -2.963        | 0.115              |
| $N_m E_l - N_l E_l$    | -122        | 51        | -2.399        | 0.497              |
| $N_h E_l - N_l E_l$    | -82         | 50        | -1.653        | 1.000              |
| $N_l E_h - N_l E_l$    | -130        | 50        | -2.575        | 0.339              |
| $N_h E_l - N_m E_l$    | 40          | 51        | 0.775         | 1.000              |
| $N_m E_h - N_m E_l$    | -87         | 49        | -1.790        | 1.000              |
| $N_h E_h - N_h E_l$    | -116        | 50        | -2.300        | 0.627              |
| $N_l E_h - E_h$        | -70         | 49        | -1.428        | 1.000              |
| $N_m E_h - E_h$        | <b>-150</b> | <b>45</b> | <b>-3.289</b> | <b>0.040</b>       |
| $N_h E_h - E_h$        | -138        | 48        | -2.854        | 0.158              |
| $N_m E_h - N_l E_h$    | -79         | 48        | -1.653        | 1.000              |
| $N_h E_h - N_l E_h$    | -68         | 51        | -1.340        | 1.000              |
| $N_h E_h - N_m E_h$    | 11          | 47        | 0.237         | 1.000              |

**Table S8.** The results of planned contrasts of estimated marginal means based on two-way ART ANOVA for all relevant comparisons between nanoplastic and enrofloxacin treatments on the respiration rate of gut microbiota of *Daphnia* expressed as  $V_{\max}$  values. Statistically significant differences effect are marked with bold (E – estimate, SE – standard error,  $T$  – T-ratio,  $P_{\text{corr.}}$  –  $p$ -value corrected).

| Contrast               | E           | SE        | $T$           | $P_{\text{corr.}}$ |
|------------------------|-------------|-----------|---------------|--------------------|
| $N_l - \text{Control}$ | <b>130</b>  | <b>22</b> | <b>5.909</b>  | <b>&lt; 0.001</b>  |
| $N_m - \text{Control}$ | <b>118</b>  | <b>22</b> | <b>5.375</b>  | <b>&lt; 0.001</b>  |
| $N_h - \text{Control}$ | 64          | 22        | 2.927         | 0.120              |
| $E_l - \text{Control}$ | -37         | 22        | -1.687        | 1.000              |
| $E_h - \text{Control}$ | -48         | 22        | -2.197        | 0.717              |
| $N_m - N_l$            | -12         | 22        | -0.533        | 1.000              |
| $N_h - N_l$            | -66         | 22        | -2.982        | 0.107              |
| $N_l E_l - N_l$        | <b>-125</b> | <b>22</b> | <b>-5.66</b>  | <b>&lt; 0.001</b>  |
| $N_l E_h - N_l$        | <b>-178</b> | <b>22</b> | <b>-8.103</b> | <b>&lt; 0.001</b>  |
| $N_h - N_m$            | -54         | 22        | -2.449        | 0.444              |
| $N_m E_l - N_m$        | <b>-163</b> | <b>22</b> | <b>-7.392</b> | <b>&lt; 0.001</b>  |
| $N_m E_h - N_m$        | <b>-136</b> | <b>22</b> | <b>-6.184</b> | <b>&lt; 0.001</b>  |
| $N_h E_l - N_h$        | -11         | 22        | -0.491        | 1.000              |
| $N_h E_h - N_h$        | <b>-140</b> | <b>22</b> | <b>-6.356</b> | <b>&lt; 0.001</b>  |
| $N_l E_l - E_l$        | 43          | 22        | 1.936         | 1.000              |
| $N_m E_l - E_l$        | -7          | 22        | -0.33         | 1.000              |
| $N_h E_l - E_l$        | <b>91</b>   | <b>22</b> | <b>4.122</b>  | <b>0.002</b>       |
| $E_h - E_l$            | -11         | 22        | -0.510        | 1.000              |
| $N_m E_l - N_l E_l$    | -50         | 22        | -2.266        | 0.626              |
| $N_h E_l - N_l E_l$    | 48          | 22        | 2.186         | 0.717              |
| $N_l E_h - N_l E_l$    | -54         | 22        | -2.443        | 0.444              |
| $N_h E_l - N_m E_l$    | <b>98</b>   | <b>22</b> | <b>4.452</b>  | <b>&lt; 0.001</b>  |
| $N_m E_h - N_m E_l$    | 27          | 22        | 1.208         | 1.000              |
| $N_h E_h - N_h E_l$    | <b>-129</b> | <b>22</b> | <b>-5.866</b> | <b>&lt; 0.001</b>  |
| $N_l E_h - E_h$        | 0           | 22        | 0.003         | 1.000              |
| $N_m E_h - E_h$        | 31          | 22        | 1.389         | 1.000              |
| $N_h E_h - E_h$        | -27         | 22        | -1.233        | 1.000              |
| $N_m E_h - N_l E_h$    | 31          | 22        | 1.386         | 1.000              |
| $N_h E_h - N_l E_h$    | -27         | 22        | -1.236        | 1.000              |
| $N_h E_h - N_m E_h$    | -58         | 22        | -2.622        | 0.283              |
